# Supplementary material for: Identification of Novel Inhibitors of Escherichia coli DNA Ligase (LigA)
Source: MDPI journal article supplement (doi:10.3390/molecules26092508), 2021-04-25
Supplement: s1 [file s1]

## Supplementary Materials

### Identification of Novel Inhibitors of *Escherichia coli* DNA Ligase (LigA)

Arqam Alomari<sup>1,2†</sup>, Robert Gowland<sup>1†</sup>, Callum Southwood<sup>1†</sup>, Jak Barrow<sup>1</sup>, Zoe Bentley<sup>1</sup>, Jashel Calvin-Nelson<sup>1</sup>, Alice Kaminski<sup>1</sup>, Matthew LeFevre<sup>1</sup>, Anastasia J. Callaghan<sup>1</sup>, Helen A. Vincent<sup>1</sup> and Darren M. Gowers<sup>1\*</sup>.

<sup>1</sup> School of Biological Sciences and Institute of Biological and Biomedical Sciences, University of Portsmouth, Portsmouth, PO1 2DY, United Kingdom.

<sup>2</sup> Current address: Department of Basic Sciences, College of Agriculture and Forestry, University of Mosul, Mosul, 41002, Iraq.

<sup>†</sup> These authors contributed equally to this work.

\* Correspondence: darren.gowers@port.ac.uk

## Supplementary References

1. Sriskanda, V., Schwer, B., Ho, C.K. and Shuman, S. Mutational analysis of *Escherichia coli* DNA ligase identifies amino acids required for nick-ligation *in vitro* and for *in vivo* complementation of the growth of yeast cells deleted for CDC9 and LIG4. *Nucleic Acids Res.* **27**, 3953-3963. doi: 10.1093/nar/27.20.3953.
2. Sriskanda, V. and Shuman, S. (2002) Conserved residues in domain Ia are required for the reaction of *Escherichia coli* DNA Ligase with NAD<sup>+</sup>. *J. Biol. Chem.* **277**, 9695-9700. doi: 10.1074/jbc.M111164200.
3. Zhu, H. and Shuman, S. (2005) Structure-guided mutational analysis of the nucleotidyltransferase domain of *Escherichia coli* NAD<sup>+</sup>-dependent DNA ligase (LigA). *J. Biol. Chem.* **280**, 12137–12144. doi: 10.1074/jbc.M413685200.
4. Wang, L.K., Nair, P.A. and Shuman, S. (2008) Structure-guided mutational analysis of the OB, HhH, and BRCT domains of *Escherichia coli* DNA ligase. *J Biol Chem.* 2008 **283**, 23343-23352. doi: 10.1074/jbc.M802945200.
5. Wang, L.K., Zhu, H. and Shuman, S. (2009) Structure-guided mutational analysis of the nucleotidyltransferase domain of *Escherichia coli* DNA Ligase (LigA). *J. Biol. Chem.* **284**, 8486–8494. doi: 10.1074/jbc.M808476200.
6. Nandakumar, J., Nair, P.A. and Shuman, S. (2007) Last stop on the road to repair: structure of *E. coli* DNA ligase bound to nicked DNA-adenylate. *Mol. Cell*, **26**, 257-271. doi: 10.1016/j.molcel.2007.02.026.

**Supplementary Table S1. A summary of mutation-mapping studies of EC-LigA performed by the Shuman group [1-5].** Amino acids are considered essential for EC-LigA function if they result in  $\geq 90\%$  inhibition of ligase activity when mutated.

| Residue | Domain | Role                                                      | Mutation | % Ligase Inhibition | Reference                          |
|---------|--------|-----------------------------------------------------------|----------|---------------------|------------------------------------|
| D285    | NTase  | Metal-binding at active site                              | A        | >99.99              | Skiskanda <i>et al.</i> , 1999 [1] |
| Y22     | Ia     | NAD+ binding                                              | A        | >99.9               | Skiskanda and Shuman, 2002 [2]     |
| Y35     | Ia     | NAD+ binding                                              | S        | >99.9               | Skiskanda and Shuman, 2002 [2]     |
| K115    | NTase  | Adenylated residue of KxDG motif                          | A        | >99.9               | Skiskanda <i>et al.</i> , 1999 [1] |
| K115    | NTase  | Adenylated residue of KxDG motif                          | R        | >99.9               | Zhu and Shuman, 2005 [3]           |
| K115    | NTase  | Adenylated residue of KxDG motif                          | Q        | >99.9               | Zhu and Shuman, 2005 [3]           |
| D117    | NTase  | KxDG motif                                                | A        | >99.9               | Skiskanda <i>et al.</i> , 1999 [1] |
| D117    | NTase  | KxDG motif                                                | N        | >99.9               | Zhu and Shuman, 2005 [3]           |
| G118    | NTase  | KxDG motif                                                | A        | >99.9               | Zhu and Shuman, 2005 [3]           |
| R136    | NTase  | Coordinates reactive phosphates, needed for steps 1 and 2 | A        | >99.9               | Wang, Zhu and Shuman, 2009 [5]     |
| R136    | NTase  | Coordinates reactive phosphates, needed for steps 1 and 2 | Q        | >99.9               | Wang, Zhu and Shuman, 2009 [5]     |
| E173    | NTase  | Contacts NAD+                                             | A        | >99.9               | Zhu and Shuman, 2005 [3]           |
| E173    | NTase  | Contacts NAD+                                             | D        | >99.9               | Zhu and Shuman, 2005 [3]           |
| E173    | NTase  | Contacts NAD+                                             | Q        | >99.9               | Zhu and Shuman, 2005 [3]           |
| R200    | NTase  | Ia/NTase interface, DNA binding                           | A        | >99.9               | Zhu and Shuman, 2005 [3]           |
| R200    | NTase  | Ia/NTase interface, DNA binding                           | K        | >99.9               | Zhu and Shuman, 2005 [3]           |
| R200    | NTase  | Ia/NTase interface, DNA binding                           | Q        | >99.9               | Zhu and Shuman, 2005 [3]           |
| R208    | NTase  | Ia/NTase interface, DNA binding                           | Q        | >99.9               | Zhu and Shuman, 2005 [3]           |
| D285    | NTase  |                                                           | N        | >99.9               | Zhu and Shuman, 2005 [3]           |
| K314    | NTase  | Contacts NAD+                                             | A        | >99.9               | Skiskanda <i>et al.</i> , 1999 [1] |
| K314    | NTase  | Contacts NAD+                                             | Q        | >99.9               | Zhu and Shuman, 2005 [3]           |
| C408    | Zn     | Metal-binding                                             | A        | >99.9               | Skiskanda <i>et al.</i> , 1999 [1] |
| C411    | Zn     | Metal-binding                                             | A        | >99.9               | Skiskanda <i>et al.</i> , 1999 [1] |
| C432    | Zn     | Metal-binding                                             | A        | >99.9               | Skiskanda <i>et al.</i> , 1999 [1] |
| Y22     | Ia     | NAD+ binding                                              | S        | 99.8                | Skiskanda and Shuman, 2002 [2]     |
| D32     | Ia     | NAD+ binding                                              | A        | 99.8                | Skiskanda and Shuman, 2002 [2]     |
| D36     | Ia     | NAD+ binding                                              | A        | 99.8                | Skiskanda and Shuman, 2002 [2]     |
| R136    | NTase  | Coordinates reactive phosphates, needed for steps 1 and 2 | K        | 99.8                | Wang, Zhu and Shuman, 2009 [5]     |
| D32     | Ia     | NAD+ binding                                              | E        | 99.6                | Skiskanda and Shuman, 2002 [2]     |
| R379    | OB     | Stabilises OB fold                                        | A        | 99.3                | Wang, Nair and Shuman, 2008 [4]    |
| R333    | OB     | DNA binding                                               | A        | 99.2                | Wang, Nair and Shuman, 2008 [4]    |
| G489    | HhH    | DNA binding                                               | D        | 99.2                | Wang, Nair and Shuman, 2008 [4]    |
| G521    | HhH    | DNA binding                                               | V        | 99.1                | Wang, Nair and Shuman, 2008 [4]    |
| G553    | HhH    | DNA binding                                               | D        | 99.1                | Wang, Nair and Shuman, 2008 [4]    |
| R171    | NTase  | Stabilise active domain fold                              | A        | >99                 | Wang, Nair and Shuman, 2008 [4]    |
| G455    | HhH    | DNA binding                                               | V        | >99                 | Wang, Nair and Shuman, 2008 [4]    |
| G455    | HhH    | DNA binding                                               | D        | >99                 | Wang, Nair and Shuman, 2008 [4]    |
| R277    | NTase  | Stabilises NTase active site fold                         | A        | 98.9                | Zhu and Shuman, 2005 [3]           |
| R208    | NTase  | Ia/NTase interface, DNA binding                           | K        | 98.8                | Zhu and Shuman, 2005 [3]           |
| R379    | OB     | Stabilises OB fold                                        | Q        | 98.8                | Wang, Nair and Shuman, 2008 [4]    |
| R277    | NTase  | Stabilises NTase active site fold                         | Q        | 98.2                | Zhu and Shuman, 2005 [3]           |
| Y35     | Ia     | NAD+ binding                                              | A        | 98                  | Skiskanda and Shuman, 2002 [2]     |
| R208    | NTase  | Ia/NTase interface, DNA binding                           | A        | 98                  | Zhu and Shuman, 2005 [3]           |
| R218    | NTase  | Bind phosphodiester bond flanking nick                    | A        | 98                  | Wang, Zhu and Shuman, 2009 [5]     |
| G521    | HhH    | DNA binding                                               | A        | 98                  | Wang, Nair and Shuman, 2008 [4]    |
| G521    | HhH    | DNA binding                                               | D        | 97.4                | Wang, Nair and Shuman, 2008 [4]    |
| R614    | BRCT   |                                                           | A        | 97.4                | Wang, Nair and Shuman, 2008 [4]    |
| D117    | NTase  | KxDG motif                                                | E        | 97                  | Zhu and Shuman, 2005 [3]           |
| R171    | NTase  | Stabilise active domain fold                              | Q        | 97                  | Wang, Zhu and Shuman, 2009 [5]     |
| K290    | NTase  | Contacts NAD+/contacts AMP adenine                        | Q        | 97                  | Wang, Zhu and Shuman, 2009 [5]     |
| G489    | HhH    | DNA binding                                               | V        | 96.8                | Wang, Nair and Shuman, 2008 [4]    |
| D36     | Ia     | NAD+ binding                                              | E        | 96                  | Skiskanda and Shuman, 2002 [2]     |
| R218    | NTase  | Bind phosphodiester bond flanking nick                    | Q        | 96                  | Wang, Zhu and Shuman, 2009 [5]     |
| D285    | NTase  |                                                           | E        | 96                  | Zhu and Shuman, 2005 [3]           |
| R308    | NTase  | Bind phosphodiester bond flanking nick                    | Q        | 96                  | Wang, Zhu and Shuman, 2009 [5]     |
| V383    | OB     | Distorts DNA at nick site                                 | A        | 96                  | Wang, Nair and Shuman, 2008 [4]    |
| I384    | OB     | Distorts DNA at nick site                                 | A        | 96                  | Wang, Nair and Shuman, 2008 [4]    |
| K314    | NTase  | Contacts NAD+                                             | R        | 95                  | Zhu and Shuman, 2005 [3]           |
| R446    | HhH    | Domain-domain interaction                                 | A        | 94.6                | Wang, Nair and Shuman, 2008 [4]    |
| R277    | NTase  | Stabilises NTase active site fold                         | K        | 94.4                | Zhu and Shuman, 2005 [3]           |
| S81     | NTase  | DNA binding                                               | A        | 94                  | Wang, Nair and Shuman, 2009 [5]    |
| R487    | HhH    | DNA binding                                               | A        | 94                  | Wang, Nair and Shuman, 2008 [4]    |
| R379    | OB     | Stabilises OB fold                                        | K        | 93.7                | Wang, Nair and Shuman, 2008 [4]    |
| C426    | Zn     | Metal-binding                                             | A        | 93                  | Skiskanda <i>et al.</i> , 1999 [1] |
| K290    | NTase  | Contacts NAD+/contacts AMP adenine                        | R        | 92                  | Wang, Zhu and Shuman, 2009 [5]     |
| Y22     | Ia     | NAD+ binding                                              | F        | 91                  | Skiskanda and Shuman, 2002 [2]     |
| D32     | Ia     | NAD+ binding                                              | N        | 91                  | Skiskanda and Shuman, 2002 [2]     |
| R308    | NTase  | Bind phosphodiester bond flanking nick                    | A        | 91                  | Wang, Zhu and Shuman, 2009 [5]     |

|            |           |                                        |          |                                          |
|------------|-----------|----------------------------------------|----------|------------------------------------------|
| <b>H23</b> | <b>Ia</b> | <b>NAD+ binding</b>                    | <b>A</b> | <b>90 Sriskanda and Shuman, 2002 [2]</b> |
| D36        | Ia        | NAD+ binding                           | N        | 88 Sriskanda and Shuman, 2002 [2]        |
| K290       | NTase     | Contacts NAD+/contacts AMP adenine     | A        | 87 Zhu and Shuman, 2005 [3]              |
| T524       | HhH       | DNA binding                            | A        | 87 Wang, Nair and Shuman, 2008 [4]       |
| G286       | NTase     |                                        | A        | 86 Zhu and Shuman, 2005 [3]              |
| R305       | NTase     |                                        | A        | 86 Wang, Zhu and Shuman, 2009 [5]        |
| K627       | BRCT      |                                        | A        | 86 Wang, Nair and Shuman, 2008 [4]       |
| R171       | NTase     | Stabilise active domain fold           | K        | 85 Wang, Zhu and Shuman, 2009 [5]        |
| R97        | NTase     | Bind phosphodiester bond flanking nick | A        | 83 Wang, Zhu and Shuman, 2009 [5]        |
| R218       | NTase     | Bind phosphodiester bond flanking nick | K        | 81 Wang, Zhu and Shuman, 2009 [5]        |
| R342       | OB        |                                        | A        | 80 Wang, Nair and Shuman, 2008 [4]       |
| N84        | NTase     | DNA binding                            | A        | 79 Wang, Zhu and Shuman, 2009 [5]        |
| T334       | OB        | DNA binding                            | A        | 79 Wang, Nair and Shuman, 2008 [4]       |
| R447       | HhH       | Domain-domain interaction              | A        | 79 Wang, Nair and Shuman, 2008 [4]       |
| T135       | NTase     | DNA binding                            | A        | 78 Wang, Zhu and Shuman, 2009 [5]        |
| T524       | HhH       | DNA binding                            | S        | 78 Wang, Nair and Shuman, 2008 [4]       |
| Y35        | Ia        | NAD+ binding                           | F        | 77 Sriskanda and Shuman, 2002 [2]        |
| Y225       | NTase     |                                        | A        | 75 Sriskanda et al., 1999 [1]            |
| R487       | HhH       | DNA binding                            | K        | 75 Wang, Nair and Shuman, 2008 [4]       |
| R487       | HhH       | DNA binding                            | Q        | 75 Wang, Nair and Shuman, 2008 [4]       |
| G489       | HhH       | DNA binding                            | A        | 75 Wang, Nair and Shuman, 2008 [4]       |
| N198       | NTase     |                                        | A        | 74 Zhu and Shuman, 2005 [3]              |
| N201       | NTase     | DNA binding                            | A        | 74 Wang, Zhu and Shuman, 2009 [5]        |
| R101       | NTase     | Bind phosphodiester bond flanking nick | A        | 72 Wang, Zhu and Shuman, 2009 [5]        |
| R97        | NTase     | Bind phosphodiester bond flanking nick | Q        | 70 Wang, Zhu and Shuman, 2009 [5]        |
| Q209       | NTase     |                                        | A        | 67 Wang, Zhu and Shuman, 2009 [5]        |
| N355       | OB        |                                        | A        | 66.7 Wang, Nair and Shuman, 2008 [4]     |
| G553       | HhH       | DNA binding                            | A        | 65 Wang, Nair and Shuman, 2008 [4]       |
| G172       | NTase     |                                        | A        | 64 Zhu and Shuman, 2005 [3]              |
| D138       | NTase     |                                        | A        | 63 Zhu and Shuman, 2005 [3]              |
| K651       | BRCT      |                                        | A        | 63 Wang, Nair and Shuman, 2008 [4]       |
| Q72        | NTase     | DNA binding                            | A        | 62 Wang, Zhu and Shuman, 2009 [5]        |
| T524       | HhH       | DNA binding                            | V        | 62 Wang, Nair and Shuman, 2008 [4]       |
| G553       | HhH       | DNA binding                            | V        | 62 Wang, Nair and Shuman, 2008 [4]       |
| S206       | NTase     |                                        | A        | 61 Wang, Zhu and Shuman, 2009 [5]        |
| E113       | NTase     |                                        | A        | 60 Sriskanda et al., 1999 [1]            |
| K648       | BRCT      |                                        | A        | 60 Wang, Nair and Shuman, 2008 [4]       |
| G455       | HhH       | DNA binding                            | A        | 56 Wang, Nair and Shuman, 2008 [4]       |
| E143       | NTase     |                                        | A        | 48 Zhu and Shuman, 2005 [3]              |
| D450       | HhH       | Domain-domain interaction              | A        | 45 Wang, Nair and Shuman, 2008 [4]       |
| D283       | NTase     |                                        | A        | 43 Zhu and Shuman, 2005 [3]              |
| R97        | NTase     | Bind phosphodiester bond flanking nick | K        | 37 Wang, Zhu and Shuman, 2009 [5]        |
| D452       | HhH       | DNA binding                            | A        | 32 Wang, Nair and Shuman, 2008 [4]       |
| E319       | NTase     |                                        | A        | 31 Sriskanda et al., 1999 [1]            |
| D551       | HhH       |                                        | A        | 29 Wang, Nair and Shuman, 2008 [4]       |
| V288       | NTase     |                                        | A        | 24 Zhu and Shuman, 2005 [3]              |
| R308       | NTase     | Bind phosphodiester bond flanking nick | K        | 20 Wang, Zhu and Shuman, 2009 [5]        |
| Q318       | NTase     |                                        | A        | 20 Sriskanda et al., 1999 [1]            |
| H23        | Ia        | NAD+ binding                           | Y        | 12 Sriskanda and Shuman, 2002 [2]        |
| E10        | Ia        |                                        | A        | 10 Sriskanda and Shuman, 2002 [2]        |
| R510       | HhH       |                                        | A        | 0 Wang, Nair and Shuman, 2008 [4]        |
| L119       | NTase     |                                        | A        | -10 Zhu and Shuman, 2005 [3]             |
| E519       | HhH       |                                        | A        | -20 Wang, Nair and Shuman, 2008 [4]      |

**Supplementary Table S2. Properties of potential inhibitor target Site 1.** Amino acids comprising potential inhibitor target Site 1 (volume = 12 Å<sup>3</sup>).

| <b>Domain/Residue</b> | <b>Essential</b> | <b>Function</b> | <b>Predicted interaction with geneticin</b> | <b>Predicted interaction with chlorhexidine</b> |
|-----------------------|------------------|-----------------|---------------------------------------------|-------------------------------------------------|
| OB-fold/R325          | Unknown          | Unknown         | Y                                           |                                                 |
| OB-fold /I371         | Unknown          | Unknown         |                                             |                                                 |
| OB-fold /G372         | Unknown          | Unknown         |                                             |                                                 |
| OB-fold /D398         | Unknown          | Unknown         | Y                                           | Y                                               |
| OB-fold /T399         | Unknown          | Unknown         |                                             |                                                 |
| OB-fold /R400         | Unknown          | Unknown         | Y                                           |                                                 |

**Supplementary Table S3. Properties of potential inhibitor target Site 2.** Amino acids comprising potential inhibitor target Site 2 (volume = 19 Å<sup>3</sup>).

| Domain/Residue  | Essential  | Function           | Predicted interaction with glutathione | Predicted interaction with imidazolidinyl urea |
|-----------------|------------|--------------------|----------------------------------------|------------------------------------------------|
| HhH/K456        | Unknown    | Unknown            |                                        |                                                |
| HhH/I458        | Unknown    | Unknown            | Y                                      |                                                |
| HhH/D460        | Unknown    | Unknown            | Y                                      |                                                |
| HhH/Q461        | Unknown    | Unknown            |                                        |                                                |
| HhH/L485        | Unknown    | Unknown            |                                        |                                                |
| HhH/E486        | Unknown    | Unknown            | Y                                      | Y                                              |
| <b>HhH/R487</b> | <b>Yes</b> | <b>DNA binding</b> |                                        | <b>Y</b>                                       |
| HhH/M488        | Unknown    | Unknown            |                                        | Y                                              |

**Supplementary Table S4. Properties of potential inhibitor target Site 3.** Amino acids comprising potential inhibitor target Site 3 (volume = 27 Å<sup>3</sup>).

| Domain/Residue | Essential | Function                  | Predicted interaction with 5-azacytidine | Predicted interaction with imidazo[1,2-a]pyridine-7-C |
|----------------|-----------|---------------------------|------------------------------------------|-------------------------------------------------------|
| NTase/L116     | Unknown   | x in KxDG motif           | Y                                        |                                                       |
| NTase/D117     | Y         | KxDG motif                |                                          |                                                       |
| NTase/G118     | Y         | KxDG motif                |                                          |                                                       |
| NTase/E173     | Y         | Contacts NAD <sup>+</sup> |                                          |                                                       |
| NTase/F175     | Unknown   | Unknown                   |                                          |                                                       |
| NTase/L176     | Unknown   | Unknown                   |                                          |                                                       |
| NTase/P177     | Unknown   | Unknown                   |                                          |                                                       |
| NTase/Q178     | Unknown   | Unknown                   |                                          |                                                       |
| NTase/P199     | Unknown   | Unknown                   |                                          |                                                       |
| NTase/R200     | Y         | DNA binding               |                                          |                                                       |
| NTase/A203     | Unknown   | Unknown                   |                                          |                                                       |
| NTase/F282     | Unknown   | Unknown                   |                                          |                                                       |
| NTase/D283     | N         | Unknown                   |                                          |                                                       |

**Supplementary Table S5. Properties of potential inhibitor target Site 4.** Amino acids comprising potential inhibitor target Site 4 (volume = 41 Å<sup>3</sup>).

| Domain/Residue | Essential | Function                       | Predicted interaction with bestatin | Predicted interaction with 2-(aminomethyl)imidazole |
|----------------|-----------|--------------------------------|-------------------------------------|-----------------------------------------------------|
| Ia/Y35         | Y         | NAD <sup>+</sup> binding       |                                     |                                                     |
| <b>Ia/D36</b>  | <b>Y</b>  | <b>NAD<sup>+</sup> binding</b> | <b>Y</b>                            | <b>Y</b>                                            |
| Ia/A65         | Unknown   | Unknown                        | Y                                   |                                                     |
| Ia/P66         | Unknown   | Unknown                        |                                     |                                                     |
| Ia/L67         | Unknown   | Unknown                        |                                     |                                                     |
| Ia/A68         | Unknown   | Unknown                        |                                     | Y                                                   |
| Ia/A69         | Unknown   | Unknown                        |                                     |                                                     |
| NTase/F70      | Unknown   | Unknown                        |                                     | Y                                                   |
| NTase/D144     | Unknown   | Unknown                        |                                     |                                                     |
| NTase/I145     | Unknown   | Unknown                        |                                     |                                                     |
| NTase/T146     | Unknown   | Unknown                        |                                     |                                                     |
| NTase/S147     | Unknown   | Unknown                        | Y                                   | Y                                                   |
| NTase/N148     | Unknown   | Unknown                        |                                     |                                                     |
| NTase/Q209     | N         | Unknown                        |                                     |                                                     |
| NTase/L210     | Unknown   | Unknown                        |                                     | Y                                                   |
| NTase/D211     | Unknown   | Unknown                        |                                     |                                                     |
| NTase/P212     | Unknown   | Unknown                        |                                     |                                                     |



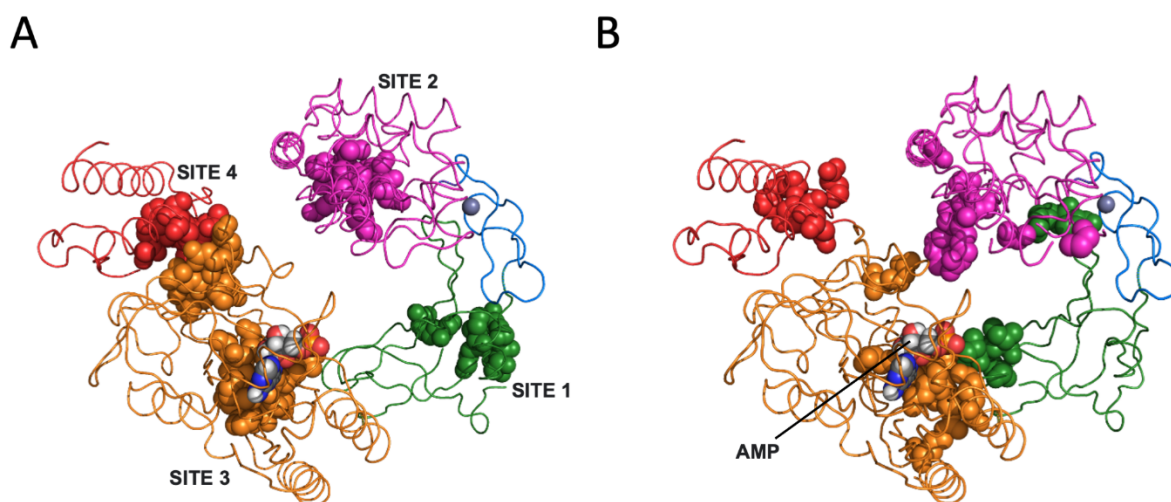

**Supplementary Figure S1. Evaluation of the functional significance of potential inhibitor target sites.**

Structure of EC-LigA (wire) coloured by domain (Ia, red; NTase, orange; OB-fold, green; Zn finger, blue; HhH, magenta) (PDB 2OWO [6] with the nicked DNA removed). The AMP from the nicked DNA-adenylate (grey, red and blue spheres) binds in the AMP-binding pocket within SITE 3. A Zn<sup>2+</sup> ion (purple sphere) is coordinated by the Zn finger domain. (A) The amino acids forming small molecule accessible sites (spheres, coloured according to domain location) identified using the MOE site-finder tool (as shown in Figure 2). The sites are labelled SITE 1 to SITE 4. (B) The amino acids that are considered to be essential for EC-LigA function based on them resulting in  $\geq 90\%$  inhibition of ligase activity when mutated [1-5] (Supplementary Table S1).

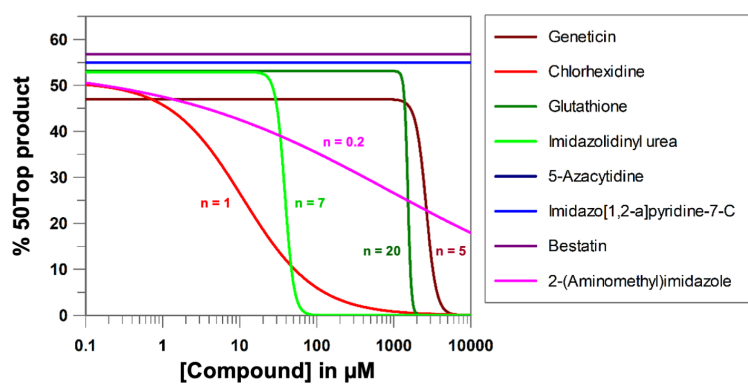

**Supplementary Figure S2. Comparison of the inhibitory activity of small molecules targeting EC-LigA.** Fits to the data shown in Figure 4B-E plotted as a semi-log plot. Values for the Hill slope factor ( $n$ ) are indicated.
